# Supplementary material
Source: MDPI journal article supplement (https://www.mdpi.com/1996-1073/12/9/1718)
Supplement: s1 [file s1]

# Supplementary Materials

## Compliance Test Report

(The astaxanthin content in *Haematococcus* extracts: 54.39 mg g<sup>-1</sup>)

| 제 D2016011386 호                                                                                                                                                                                                                                  |            |                 |                |      |    |       |                    |           |     |
|--------------------------------------------------------------------------------------------------------------------------------------------------------------------------------------------------------------------------------------------------|------------|-----------------|----------------|------|----|-------|--------------------|-----------|-----|
| 검 사 성 적 서                                                                                                                                                                                                                                        |            |                 |                |      |    |       |                    |           |     |
| 검체명                                                                                                                                                                                                                                              | 해마토코쿠스 추출물 | 제조일자<br>(유통기한)  |                |      |    |       |                    |           |     |
| 입체명                                                                                                                                                                                                                                              | (주)유온스     |                 |                |      |    |       |                    |           |     |
| 의뢰인                                                                                                                                                                                                                                              | 주소         | 경기도 성남시 분당구 삼평동 | 관교이노밸리 C동 901호 |      |    |       |                    |           |     |
| 성명                                                                                                                                                                                                                                               | 전재갑        |                 |                |      |    |       |                    |           |     |
| 제조번호                                                                                                                                                                                                                                             |            | 접수년월일           | 2016-01-25     |      |    |       |                    |           |     |
| 검사의뢰목적                                                                                                                                                                                                                                           | 참고용        | 검체접수번호          | D2016011386    |      |    |       |                    |           |     |
| <p>귀하가 우리 연구원에 검사의뢰한 결과는 다음과 같습니다. 검사관련 총 책임자:김 천 희</p> <table border="1"> <thead> <tr> <th>시험항목</th> <th>결과</th> <th>검사담당자</th> </tr> </thead> <tbody> <tr> <td>아스타잔틴(mg/g)(아스타잔틴)</td> <td>54.39mg/g</td> <td>한아름</td> </tr> </tbody> </table> |            |                 |                | 시험항목 | 결과 | 검사담당자 | 아스타잔틴(mg/g)(아스타잔틴) | 54.39mg/g | 한아름 |
| 시험항목                                                                                                                                                                                                                                             | 결과         | 검사담당자           |                |      |    |       |                    |           |     |
| 아스타잔틴(mg/g)(아스타잔틴)                                                                                                                                                                                                                               | 54.39mg/g  | 한아름             |                |      |    |       |                    |           |     |
| <p>2016년 1월 26일</p> <p>한국기능식품연구원</p>                                                                                                                                                                                                             |            |                 |                |      |    |       |                    |           |     |

## Compliance Test Report

(Pb: 0.0181 mg kg<sup>-1</sup>, Cd: 0.0083 mg kg<sup>-1</sup>, Hg: 0.007 mg kg<sup>-1</sup>, As: 0.1175 mg kg<sup>-1</sup>, *E. coli* (bacteria): negative)

| 제 D2016041377 호                                                                                                                                                                                                                                                                                                                                                                                                                                                                               |             |                 |                |      |    |       |          |             |     |            |             |     |            |            |      |            |             |     |      |    |     |
|-----------------------------------------------------------------------------------------------------------------------------------------------------------------------------------------------------------------------------------------------------------------------------------------------------------------------------------------------------------------------------------------------------------------------------------------------------------------------------------------------|-------------|-----------------|----------------|------|----|-------|----------|-------------|-----|------------|-------------|-----|------------|------------|------|------------|-------------|-----|------|----|-----|
| 검 사 성 적 서                                                                                                                                                                                                                                                                                                                                                                                                                                                                                     |             |                 |                |      |    |       |          |             |     |            |             |     |            |            |      |            |             |     |      |    |     |
| 검체명                                                                                                                                                                                                                                                                                                                                                                                                                                                                                           | 해마토코쿠스 추출물  | 제조일자<br>(유통기한)  |                |      |    |       |          |             |     |            |             |     |            |            |      |            |             |     |      |    |     |
| 입체명                                                                                                                                                                                                                                                                                                                                                                                                                                                                                           | (주)유온스      |                 |                |      |    |       |          |             |     |            |             |     |            |            |      |            |             |     |      |    |     |
| 의뢰인                                                                                                                                                                                                                                                                                                                                                                                                                                                                                           | 주소          | 경기도 성남시 분당구 삼평동 | 관교이노밸리 C동 901호 |      |    |       |          |             |     |            |             |     |            |            |      |            |             |     |      |    |     |
| 성명                                                                                                                                                                                                                                                                                                                                                                                                                                                                                            | 전재갑         |                 |                |      |    |       |          |             |     |            |             |     |            |            |      |            |             |     |      |    |     |
| 제조번호                                                                                                                                                                                                                                                                                                                                                                                                                                                                                          |             | 접수년월일           | 2016-04-19     |      |    |       |          |             |     |            |             |     |            |            |      |            |             |     |      |    |     |
| 검사의뢰목적                                                                                                                                                                                                                                                                                                                                                                                                                                                                                        | 제출용         | 검체접수번호          | D2016041377    |      |    |       |          |             |     |            |             |     |            |            |      |            |             |     |      |    |     |
| <p>귀하가 우리 연구원에 검사의뢰한 결과는 다음과 같습니다. 검사관련 총 책임자:김 천 희</p> <table border="1"> <thead> <tr> <th>시험항목</th> <th>결과</th> <th>검사담당자</th> </tr> </thead> <tbody> <tr> <td>납(mg/kg)</td> <td>0.0181mg/kg</td> <td>류미진</td> </tr> <tr> <td>카드뮴(mg/kg)</td> <td>0.0083mg/kg</td> <td>류미진</td> </tr> <tr> <td>중수은(mg/kg)</td> <td>0.007mg/kg</td> <td>박세롬이</td> </tr> <tr> <td>총비소(mg/kg)</td> <td>0.1175mg/kg</td> <td>류미진</td> </tr> <tr> <td>대장균군</td> <td>음성</td> <td>고민재</td> </tr> </tbody> </table> |             |                 |                | 시험항목 | 결과 | 검사담당자 | 납(mg/kg) | 0.0181mg/kg | 류미진 | 카드뮴(mg/kg) | 0.0083mg/kg | 류미진 | 중수은(mg/kg) | 0.007mg/kg | 박세롬이 | 총비소(mg/kg) | 0.1175mg/kg | 류미진 | 대장균군 | 음성 | 고민재 |
| 시험항목                                                                                                                                                                                                                                                                                                                                                                                                                                                                                          | 결과          | 검사담당자           |                |      |    |       |          |             |     |            |             |     |            |            |      |            |             |     |      |    |     |
| 납(mg/kg)                                                                                                                                                                                                                                                                                                                                                                                                                                                                                      | 0.0181mg/kg | 류미진             |                |      |    |       |          |             |     |            |             |     |            |            |      |            |             |     |      |    |     |
| 카드뮴(mg/kg)                                                                                                                                                                                                                                                                                                                                                                                                                                                                                    | 0.0083mg/kg | 류미진             |                |      |    |       |          |             |     |            |             |     |            |            |      |            |             |     |      |    |     |
| 중수은(mg/kg)                                                                                                                                                                                                                                                                                                                                                                                                                                                                                    | 0.007mg/kg  | 박세롬이            |                |      |    |       |          |             |     |            |             |     |            |            |      |            |             |     |      |    |     |
| 총비소(mg/kg)                                                                                                                                                                                                                                                                                                                                                                                                                                                                                    | 0.1175mg/kg | 류미진             |                |      |    |       |          |             |     |            |             |     |            |            |      |            |             |     |      |    |     |
| 대장균군                                                                                                                                                                                                                                                                                                                                                                                                                                                                                          | 음성          | 고민재             |                |      |    |       |          |             |     |            |             |     |            |            |      |            |             |     |      |    |     |
| <p>2016년 4월 27일</p> <p>한국기능식품연구원</p>                                                                                                                                                                                                                                                                                                                                                                                                                                                          |             |                 |                |      |    |       |          |             |     |            |             |     |            |            |      |            |             |     |      |    |     |

## Compliance Test Report

(Acetone: negative)

| 제 D2016041380 호                                                                                                                                                                                                                    |            |                 |                |      |    |       |            |     |     |
|------------------------------------------------------------------------------------------------------------------------------------------------------------------------------------------------------------------------------------|------------|-----------------|----------------|------|----|-------|------------|-----|-----|
| 검 사 성 적 서                                                                                                                                                                                                                          |            |                 |                |      |    |       |            |     |     |
| 검체명                                                                                                                                                                                                                                | 해마토코쿠스 추출물 | 제조일자<br>(유통기한)  |                |      |    |       |            |     |     |
| 입체명                                                                                                                                                                                                                                | (주)유온스     |                 |                |      |    |       |            |     |     |
| 의뢰인                                                                                                                                                                                                                                | 주소         | 경기도 성남시 분당구 삼평동 | 관교이노밸리 C동 901호 |      |    |       |            |     |     |
| 성명                                                                                                                                                                                                                                 | 전재갑        |                 |                |      |    |       |            |     |     |
| 제조번호                                                                                                                                                                                                                               |            | 접수년월일           | 2016-04-19     |      |    |       |            |     |     |
| 검사의뢰목적                                                                                                                                                                                                                             | 제출용        | 검체접수번호          | D2016041380    |      |    |       |            |     |     |
| <p>귀하가 우리 연구원에 검사의뢰한 결과는 다음과 같습니다. 검사관련 총 책임자:김 천 희</p> <table border="1"> <thead> <tr> <th>시험항목</th> <th>결과</th> <th>검사담당자</th> </tr> </thead> <tbody> <tr> <td>아세톤(mg/kg)</td> <td>불검출</td> <td>이예성</td> </tr> </tbody> </table> |            |                 |                | 시험항목 | 결과 | 검사담당자 | 아세톤(mg/kg) | 불검출 | 이예성 |
| 시험항목                                                                                                                                                                                                                               | 결과         | 검사담당자           |                |      |    |       |            |     |     |
| 아세톤(mg/kg)                                                                                                                                                                                                                         | 불검출        | 이예성             |                |      |    |       |            |     |     |
| <p>2016년 5월 2일</p> <p>한국기능식품연구원</p>                                                                                                                                                                                                |            |                 |                |      |    |       |            |     |     |
